# Supplementary material
Source: Research Square preprint supplement (doi:10.21203/rs.3.rs-9897300/v1)
Supplement: Supplementary file 1 [file bc879765d001c42557e7a3c5.docx]

***Supplementary Materials***

**Waste to Treasure: Catalytic Reduction of Triphenylphosphine Oxide with Pyrophosphonic Acid Waste**

Tieqiao Chen,2,3* Xin Wang,3 Xiaoxiang Xi,1,3 Jianqiu Zhang,3 Jing Xiao,4 and Li-Biao Han1,2,3*

1College of Chemistry & Chemical Engineering, Shaoxing University, Shaoxing 312000, China.

2School of Chemistry and Chemical Engineering, Hainan University, Haikou, 570228, China.

3Zhejiang Yangfan New Material Co., Ltd., Shangyu, Zhejiang Province, 312369, China.

4School of Chemistry and Chemical Engineering, Hunan University of Science and Technology, Xiangtan, 411201, China.

1. mail: chentieqiao@hnu.edu.cn; [hlb@shoufuchem.com](mailto:hlb@shoufuchem.com)

**This PDF file includes:**

General Information

Supplementary Text

Content

[1. General Information 3](#_Toc16446)

[2. About the waste “H](#_Toc10561)[3](#_Toc10561)[PO](#_Toc10561)[3](#_Toc10561)[” 3](#_Toc10561)

[3. Comparison of reactivity of waste “H](#_Toc29091)[3](#_Toc29091)[PO](#_Toc29091)[3](#_Toc29091)[” with pure H](#_Toc29091)[3](#_Toc29091)[PO](#_Toc29091)[3](#_Toc29091)*[a](#_Toc29091)* [7](#_Toc29091)

[4. Screening on iodocompounds as catalyst](#_Toc1840)*[a](#_Toc1840)* [8](#_Toc1840)

[5. 100 g-scale reduction of Ph](#_Toc20382)[3](#_Toc20382)[P(O). 9](#_Toc20382)

1. General Information

All reactions were carried out in oven dried glass tubes under nitrogen atmosphere. All materials were purchased and used without further purification. 31P NMR and 1H NMR spectra were recorded on a Magritek Spinsolve NMR Ultra 80M (80 MHz for 1H, 33 MHz for 31P NMR). 1H NMR spectra were related to Me4Si (0 ppm) as an internal standard. Chemical shifts for 31P NMR were related to 85% H3PO4 solution as an external standard (0 ppm). GC (FID) was recorded on the Agilent 8890 GC System, GC-MS detection was conducted on a Shimadzu GCMS-QP 2020 NX.

1. About the waste “H3PO3”

It is a humic syrup. Samples from the factory appears pale yellow to dark brown depending on the manufacturing process (Fig. 1), with a bad smelling because of the remained trace acid and/or acyl chloride. Samples prepared from the laboratory is a colorless syrup. It may fog in the air due to the presence of little HCl.


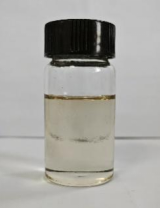


**Fig. 1. The waste “H3PO3” from the factory.**

As shown below, the 1H NMR spectrum of the syrup (80 MHz) could not recognize organic residues (Fig. 2). Its extractant using CDCl3 (600 MHz), however, did show the possible presence of trace organic chemicals which appeared between d 0-3 ppm (Fig. 3).


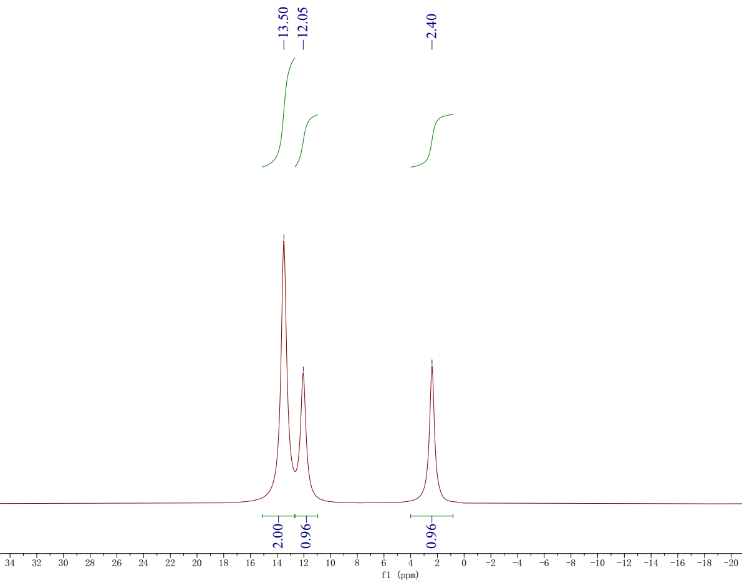


**Fig. 2. 1H NMR spectroscopy (80 MHz) of the neat “H3PO3” from the factory.**


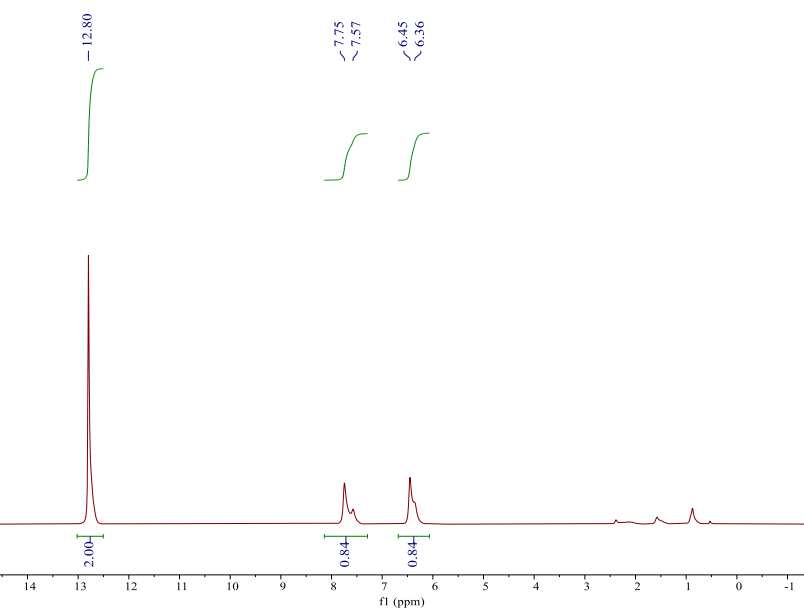


**Fig. 3. 1H NMR spectroscopy (600 MHz, CDCl3) of the extractants of waste “H3PO3” from the factory.**


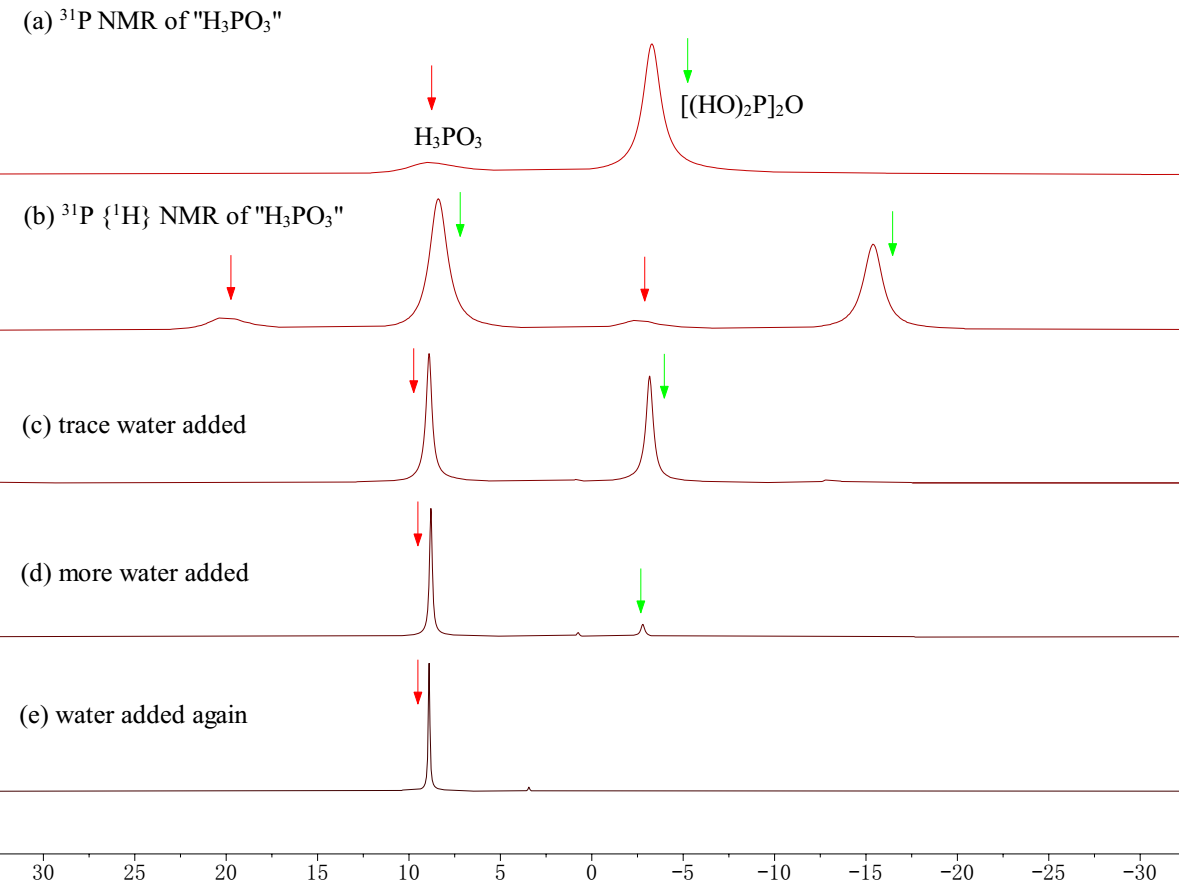


**Fig. 4. 31P NMR spectra of the waste “H3PO3”**

As shown in Fig. 4, the 31P NMR spectrum of the waste “H3PO3” obtained from the factory shows two signals at 6 ppm (*J*P-H = 746.5 Hz) and -3 ppm (*J*P-H = 785.4 Hz) in a ratio of ca. 30:70. The signal at 6 ppm is assigned to H3PO3. The signal at -3 ppm, as clearly indicated by 31P{1H} NMR, also contains a P(O)H group. When water was added, the signal at -3 ppm disappeared, leaving H3PO3 as the predominant phosphorus species. Therefore, the signal at -3 ppm was deduced to be pyrophosphonic acid [H(HO)P(O)]2O. This assignment was further confirmed by comparison with an authentic sample of [H(HO)P(O)]2O prepared separately. Thus, although, literatures described the generation of H3PO3 during the reaction of RCO2H with PCl3 (Fig. 5, eq 1), we assume that this conclusion was wrong. The reaction produced pyrophosphonic acid firstly that is then hydrolyzed by water to give H3PO3 (Fig. 5, eq 2).

**Fig. 5. The generation path of H3PO3**

**A typical procedure for the preparation of the waste “H3PO3”:** *i*-PrCO2H (2.5 mol, 220.3 g) was added to a 500 mL flask under nitrogen. Then PCl3 (1.0 mol, 137.3 g) was added dropwise. The mixture was then heated in an oil bath at 50 oC for 2 h. The upper layer (*i*-PrC(O)Cl) was removed by decantation, leaving the waste “H3PO3” as a clear syrup (67.5 g) that contains 98% hypophosphonic acid and 2% H3PO3 as determined by 31P NMR.

As shown below, it seems that the ratio of *i*-PrCO2H to PCl3 does not affect the results a lot: with less or more *i*-PrCO2H, hypophosphonic acid is always generated predominantly as determined by 31P NMR spectroscopy (Fig. 6).

| equivs of *i*-PrCO2H | equivs of PCl3 | ratio of hypophosphonic acid to “H3PO3” |
| --- | --- | --- |
| 3.0 | 1.0 | 93/7 |
| 3.5 | 1.0 | 92/8 |
| 3.0 | 1.2 | 98/2 |


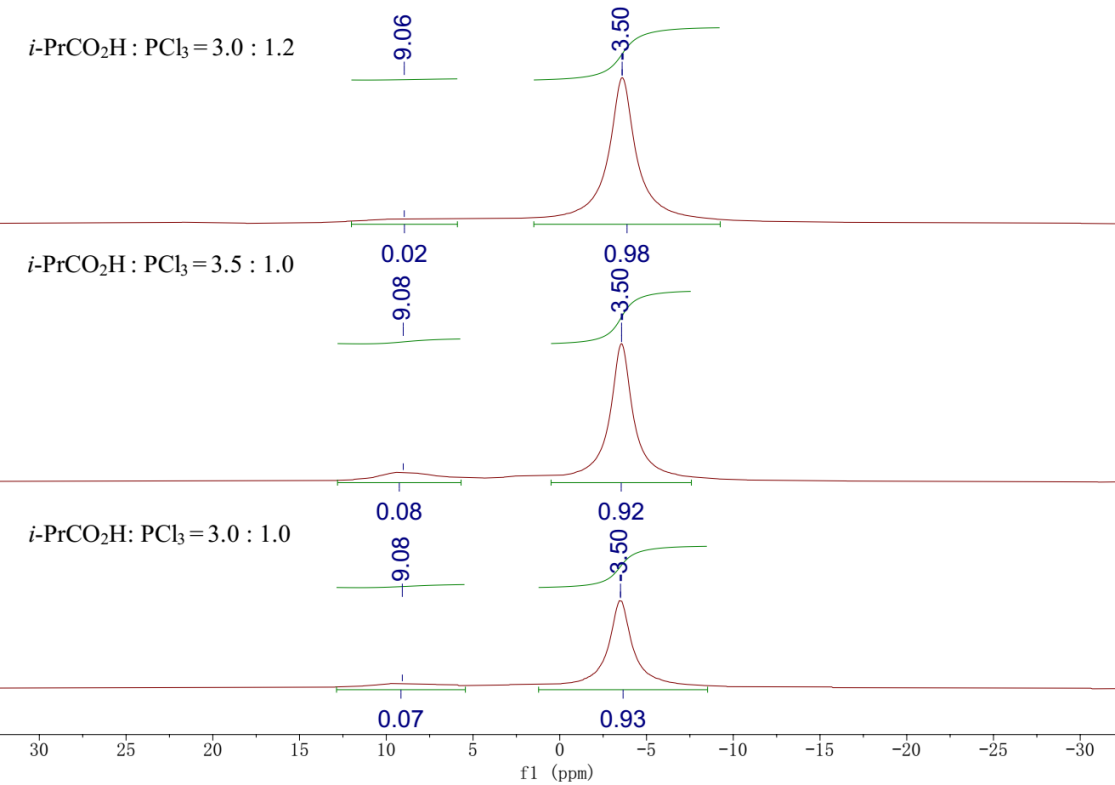


**Fig. 6. 31P NMR spectroscopies of the waste “H3PO3” produced.**

1. Comparison of reactivity of waste “H3PO3” with pure H3PO3*a*

Ph3P(O) (1 mmol) and waste “H3PO3” (ca. 2.1 mmol based on P atom) were mixed in toluene (3 mL) and heated at 110 oC for 5 h. GC yield using docecane as a standard. As described below, the waste “H3PO3” is a mixture of H3PO3 and pyrophosphonic acid with a ratio of 30 to 70 as estimated by 31P NMR. *b*In the absence of the I2 catalyst. *c*5 mmol waste “H3PO3”. *d*10 mmol waste “H3PO3”.

A typical procedure taking entry 13 as an example: Ph3P(O) (1.0 mmol, 278.2 mg), H3PO3 (2.1 mmol, 172.2 mg), P2O5 (0.2 mmol, 28.4 mg), and toluene (3 mL) were added to a 25 mL-Schlenk glass tube in a N2-glove box, and then I2 (0.02 mmol, 5.1 mg) was added under nitrogen. The glass tube was sealed and heated at 110 ℃ for 5 h. After cooling, water (1 mL) and *n*-C12H26 (internal standard, 75 mg) were added. The organic layer was analyzed by GC, and 11% yield of Ph3P was obtained.

1. Screening on iodocompounds as catalyst*a*

*a*Ph3P(O) (1 mmol) and waste “H3PO3” (ca. 2.1 mmol based on P atom) were mixed in toluene (3 mL) and heated for indicated time. GC yield using docecane as a standard. Toluene was used at 100 oC, and *p*-xylene was used above 100 oC. The waste “H3PO3” was obtained from the reaction of *i*-PrCO2H with PCl3 which contains ca. 95% [H(HO)P(O)]2O and 5% H3PO3. *b*HI was in situ generated by the reaction of TMSI with water. *c*>99% pure pyrophosphonic acid prepared by the literature from PCl3 and water was used.

A typical procedure taking entry 6 as an example: Ph3P(O) (1.0 mmol, 278.2 mg), “H3PO3” (1.0 mmol, 146.0 mg), KI (0.02 mmol, 3.3 mg), and *p*-xylene (3 mL) were added to a 25mL-Schlenk glass tube in a N2-glove box. The glass tube was sealed and heated at 150 ℃ for 16 h. After cooling, water (1 mL) and *n*-C12H26 (internal standard, 75 mg) were added. The organic layer was analyzed by GC, and 83% yield of Ph3P was obtained.

1. 100 g-scale reduction of Ph3P(O).

**Fig. 7. The reaction schemes of the reduction of Ph3P(O) by “H3PO3” catalyzed by CH2I2.**

**Preparation of the waste "H3PO3" using an industrial process (Fig. 7a):** *i*-PrCO2H (2.5 mol, 220.3 g) was added to a 500 mL flask under nitrogen. Then PCl3 (1.0 mol, 137.3 g) was added dropwise. The mixture was then heated in an oil bath at 50 oC for 2 h. The upper layer (*i*-PrC(O)Cl) was removed by decantation, leaving the waste “H3PO3” as a clear syrup (67.5 g) that contains 98% hypophosphonic acid and 2% H3PO3 as determined by 31P NMR.

**Reduction of Ph3P(O) to Ph3P with the waste "H3PO3" catalyzed by CH2I2 (Fig. 7b):** Under nitrogen, Ph3P(O) (100.0 g, 359.3 mmol), the waste “H3PO3” (104.9 g, 718.7 mmol), CH2I2 (1.9 g, 7.2 mmol) and *p*-xylene (0.58 L) were added to a 1 L flask equipped with a cooling condenser and a mechanic stirrer. The flask was put into an oil bath at 150 ℃ and heated for 16 h. After cooling to room temperature, water (100 mL) was added. And the organic layer was collected. The aqua phase was extracted with EtOAc (100 mL) twice, and the combined organic layer was washed with 100 mL H2O. The organic solution was dried using MgSO4, and the volatiles were roughly removed under a reduced pressure to get the crude Ph3P (96.2 g). The crude Ph3P was dissolved in 100 g EtOH at 70 ℃, and then slowly cooled to 0 ℃. The white precipitation was collected and dried under vacuum to obtain analytically pure Ph3P (83.9 g, 89%), GC purity> 99 % (Fig. 8), mp. 79-81 ℃. It is also confirmed by NMR analysis (Fig.s 9 and 10).


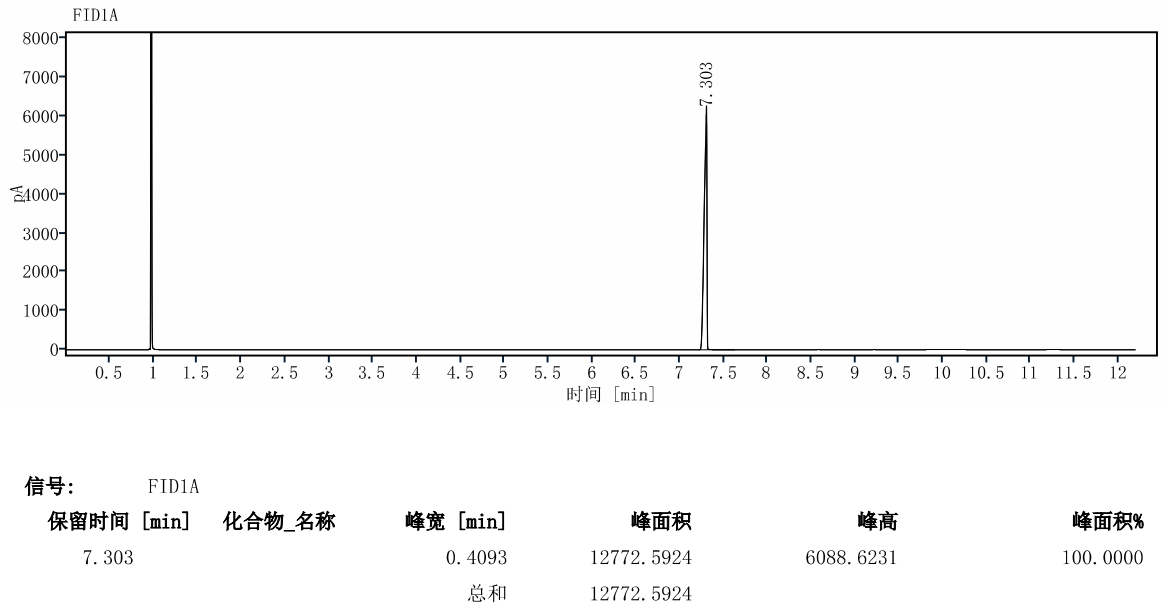


**Fig. 8. GC (FID) analysis of the pure product Ph3P**


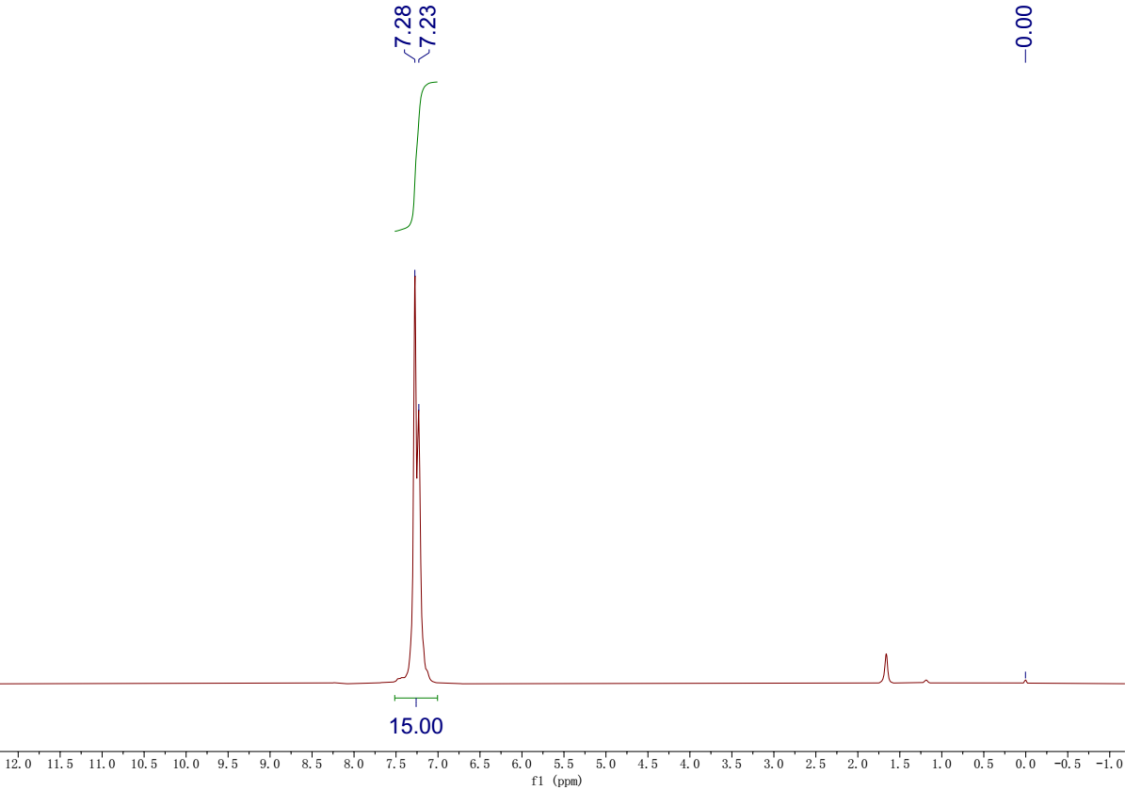


**Fig. 9. 1H NMR of Ph3P（80 MHz, CDCl3）**


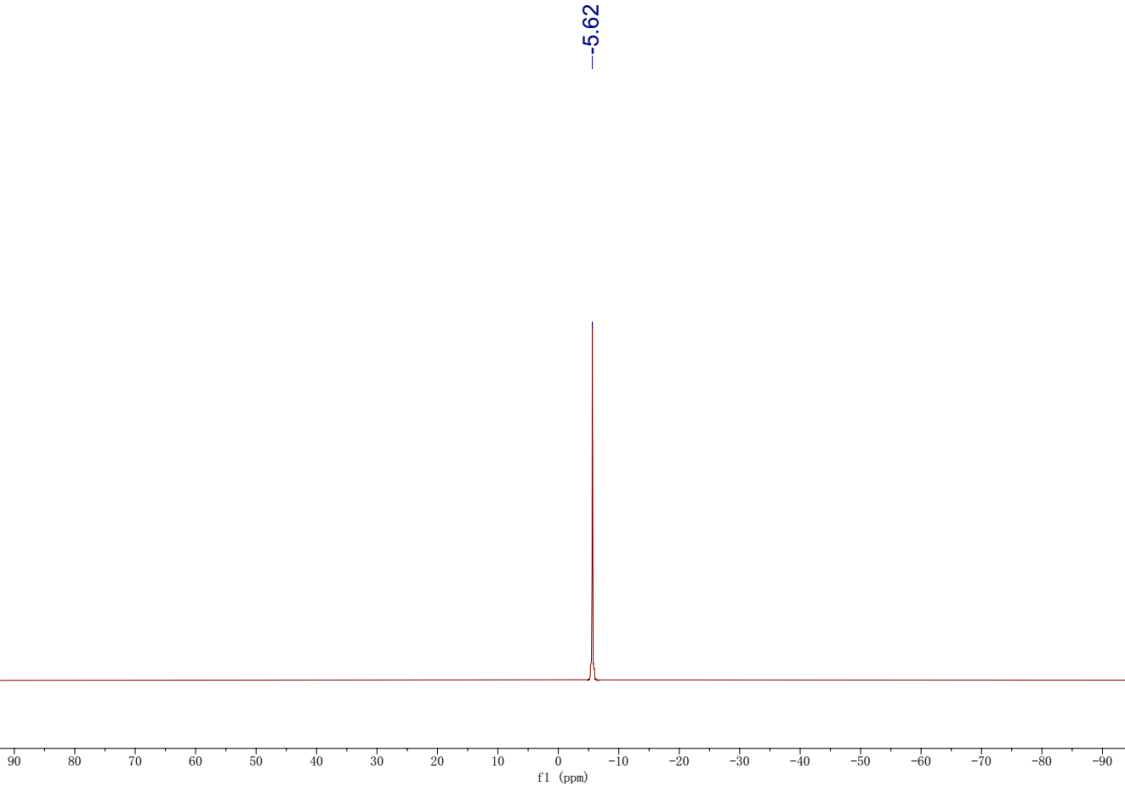


**Fig. 10. 31P NMR of Ph3P（33 MHz, CDCl3）**
